# Supplementary material for: The role of artificial intelligence in achieving the Sustainable Development Goals
Source: PubMed Central journal article supplement (PMC6957485; doi:10.1038/s41467-019-14108-y), 2020-01-13
Supplement: 41467_2019_14108_MOESM1_ESM.pdf [file 41467_2019_14108_MOESM1_ESM.pdf]

## **Description of Additional Supplementary Files**

File Name: Supplementary Data 1

Description: Identified positive and negative impacts of AI on each of the SDG targets, including reasoning and references.
